# Supplementary material for: Improved CUT&RUN chromatin profiling tools
Source: eLife journal article supplement (doi:10.7554/elife.46314), 2019-06-24
Supplement: supp [file elife-46314-supp-v1.zip]

**A**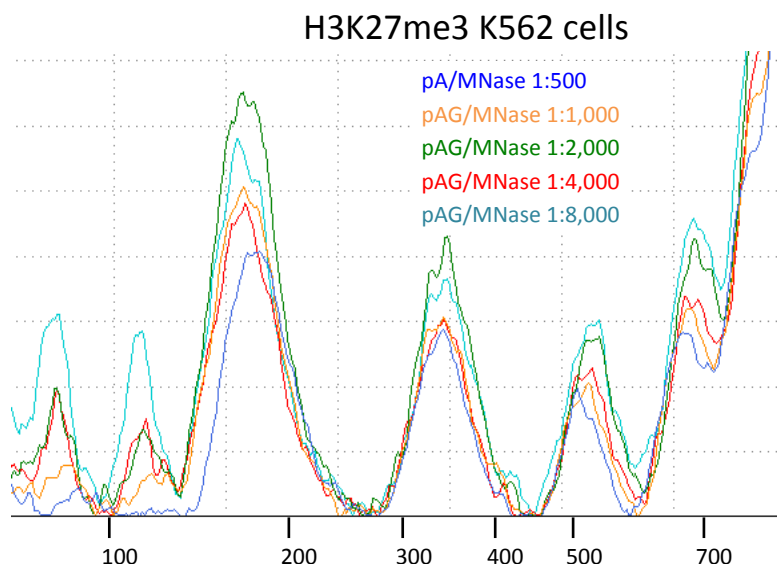**B**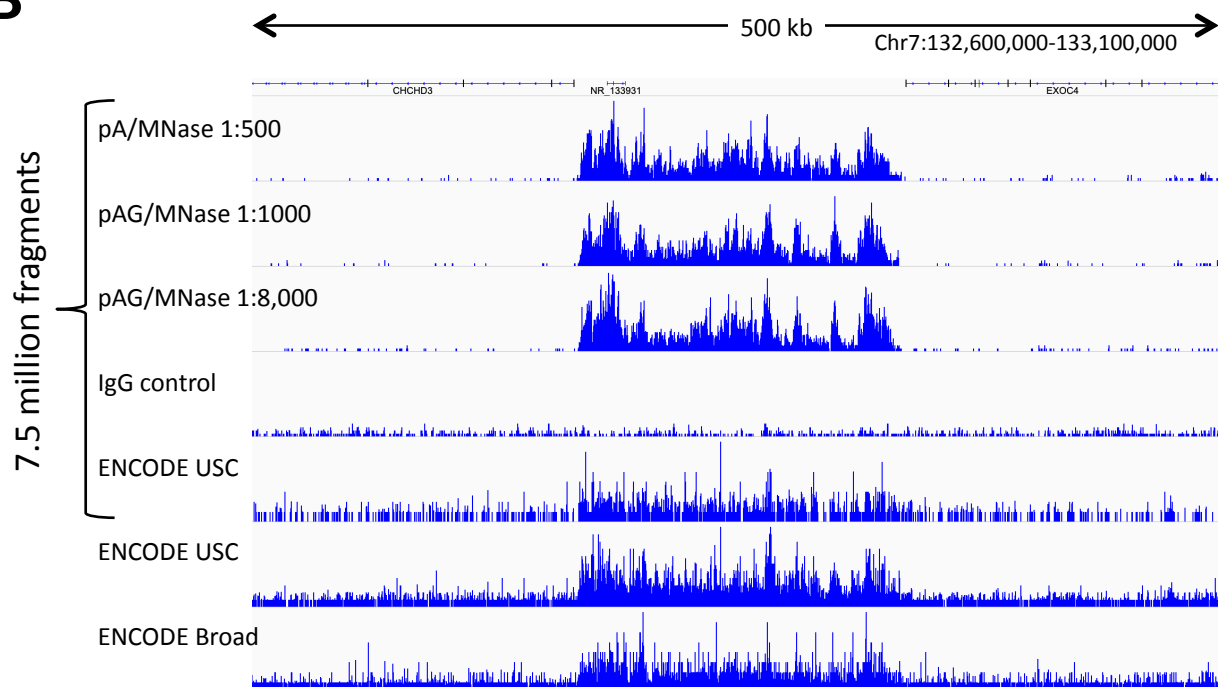

**Figure 1 – figure supplement 2. pAG/MNase titration. A)** K562 cells were incubated with an antibody to H3K27me3 (CST #9733 Rabbit monoclonal), washed twice with 1 ml Dig-wash. The sample was split into aliquots for incubation with pA/MNase at the recommended concentration and a serial dilution of pAG/MNase, followed by 3 1 ml washes. After 30 min using the standard protocol, Ilmit digestions are seen at all dilutions for this abundant epitope, indicating that the amount of fusion protein used in this experiment was in excess. **B)** Representative tracks from these samples on the same normalized count scale show consistently low CUT&RUN backgrounds with excess pAG/MNase, which indicates that washes are sufficient to minimize non-specific background cleavages. ENCODE ChIP-seq tracks are shown for comparison, where USC used CST #9733, and Broad Institute used Millipore 07-449.
