# Supplementary material for: Improved CUT&RUN chromatin profiling tools
Source: eLife journal article supplement (doi:10.7554/elife.46314), 2019-06-24
Supplement: supp [file elife-46314-supp-v1.zip]

**A**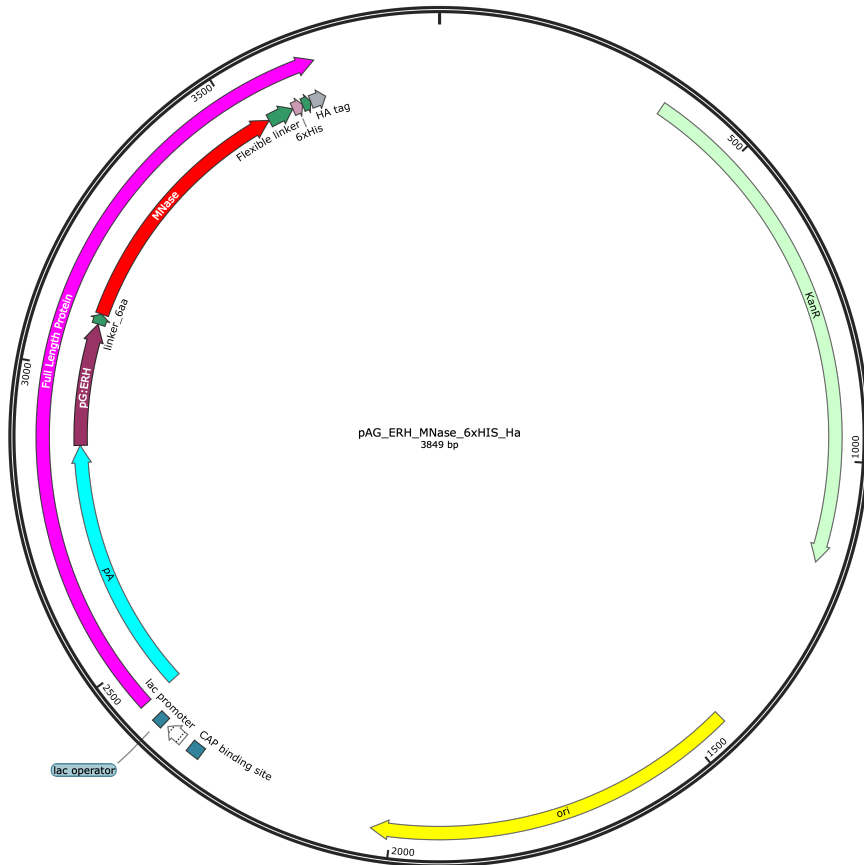**B**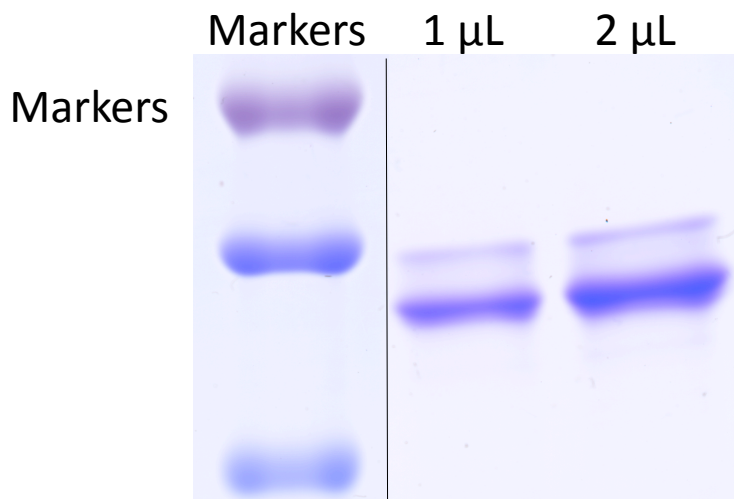

**Figure 1 – figure supplement 1. An improved fusion protein for CUT&RUN. A)** Plasmid map of pAG-ERH-MNase-6xHIS-HA. **B)** Coomassie-stained gel of fusion protein eluted from nickel-agarose.
