# Supplementary figures and images for: Improved CUT&RUN chromatin profiling tools
Source: eLife journal article supplement (doi:10.7554/elife.46314), 2019-06-24

H3K27ac

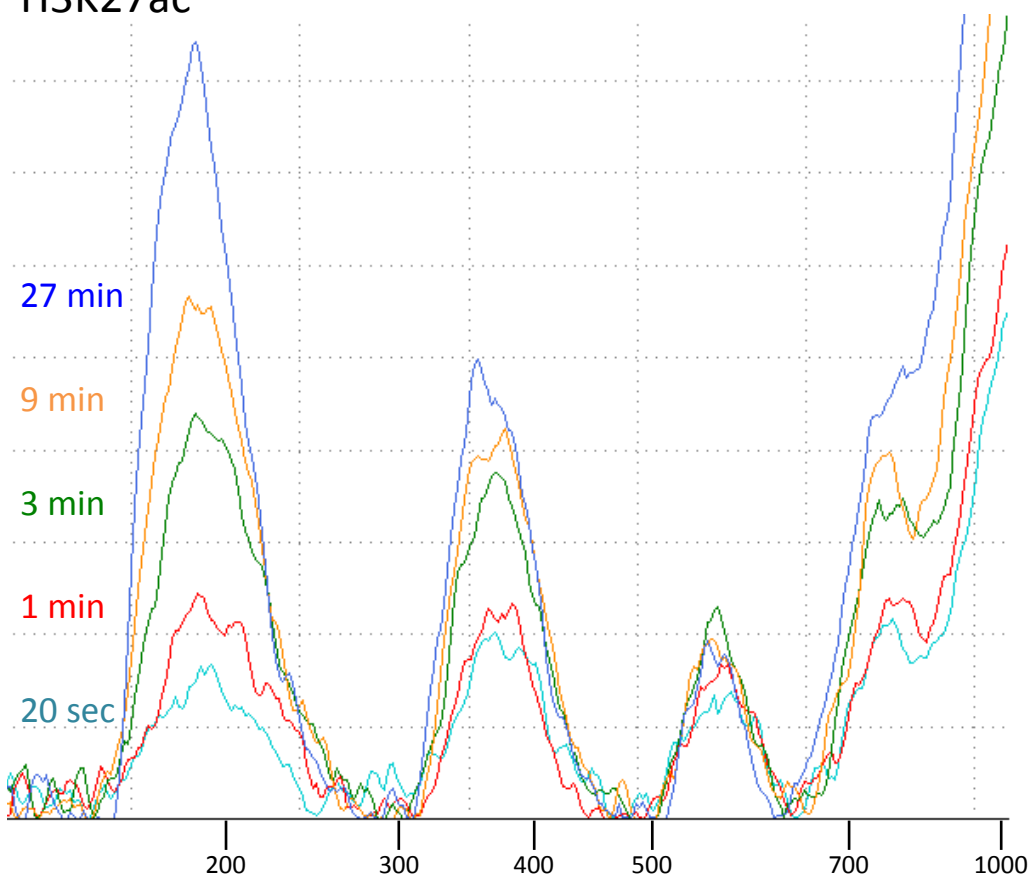

Supplement: supp [file elife-46314-supp-v1.zip]
